# Supplementary material for: Targeting MDR Pseudomonas aeruginosa biofilm with an evolutionary trained bacteriophage cocktail exploiting phage resistance trade-offs
Source: Research Square preprint supplement (doi:10.21203/rs.3.rs-2545888/v1), 2023-06-19
Supplement: Supplementary file 1 [file f9be1b4fe0a4dbf8b5b87ae3.pdf]

## **Extended Data**

**Targeting MDR *Pseudomonas aeruginosa* biofilm with an evolutionary trained bacteriophage cocktail exploiting phage resistance trade-offs**

### **Figures**

Figure E1: Overview of the bacteriophages and bacterial strains included in the evolution assay.

Figure E2: Bacteriophage activity analysis during the evolution assay.

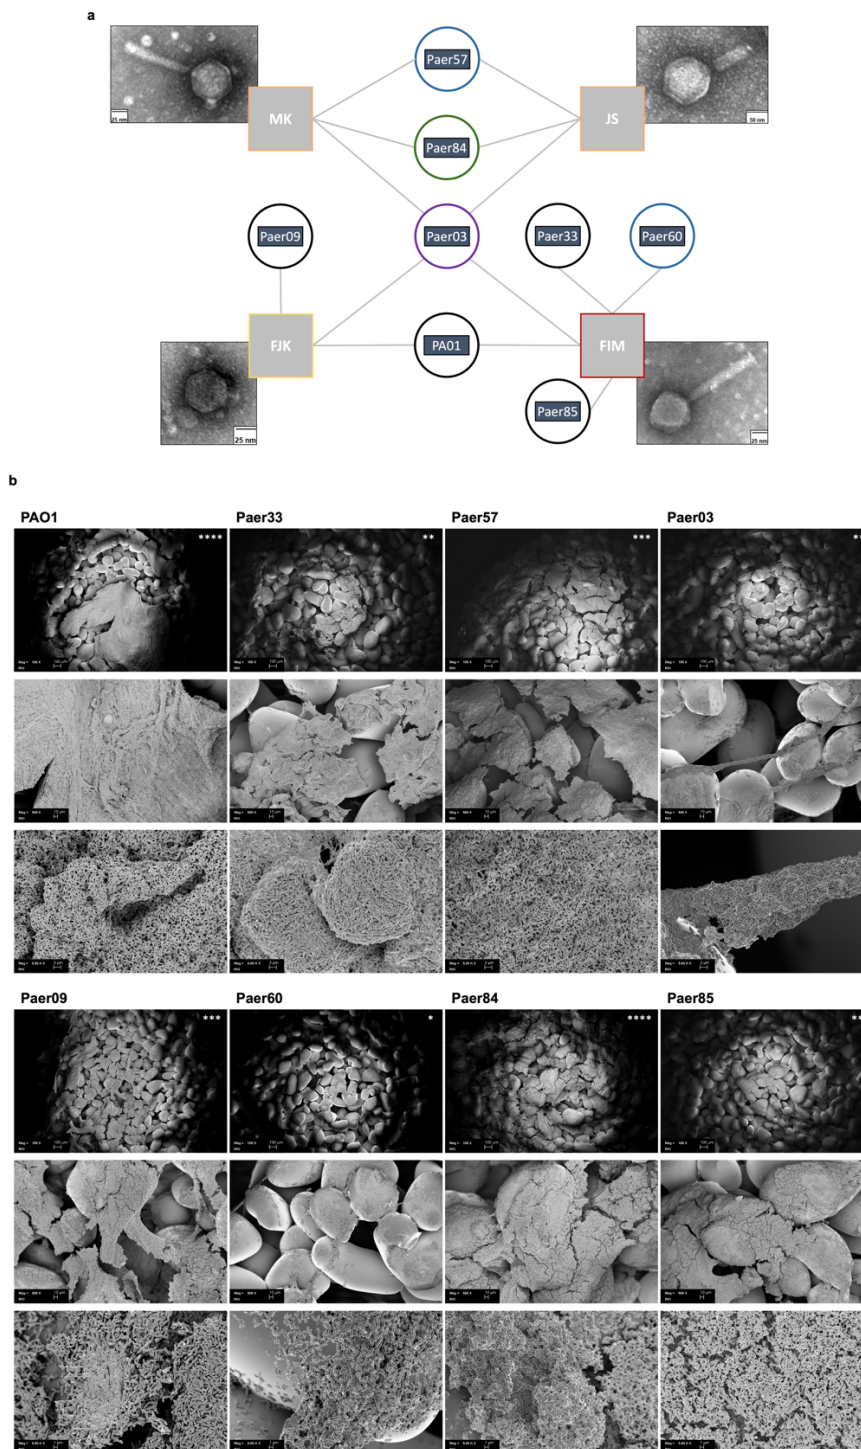

**Fig. E1: Overview of the bacteriophages and bacterial strains included in the evolution assay.**

**a**, Transmission electron microscopy images of the four ancestral bacteriophages (*Pakpunavirus*: MK/JS, orange square; *Bruynoghevirus*: FJK, yellow square and *Pbunavirus*: FIM, red square) and their host range (connecting lines) among the eight *P. aeruginosa* strains included in the *in-vitro* evolution and belonging to four genomic clusters (Cluster 1: PAO1/Paer09/Paer33/Paer85, black circle; Cluster 2: Paer57/Paer60, blue circle; Cluster 3: Paer03, violet circle; Cluster 4: Paer84, green circle). **b**, Scanning

19 electron microscopy images of the pre-established 24-h-biofilm of each *P. aeruginosa* strain included in  
20 the evolution assay displayed at three different magnifications (top row – Mag 100 X; middle row – Mag  
21 500 X; bottom row – Mag 5000 X). The number of stars in the top row indicate the biofilm density (more  
22 stars corresponding to higher biofilm density) for each strain in comparison to one another.

23

24

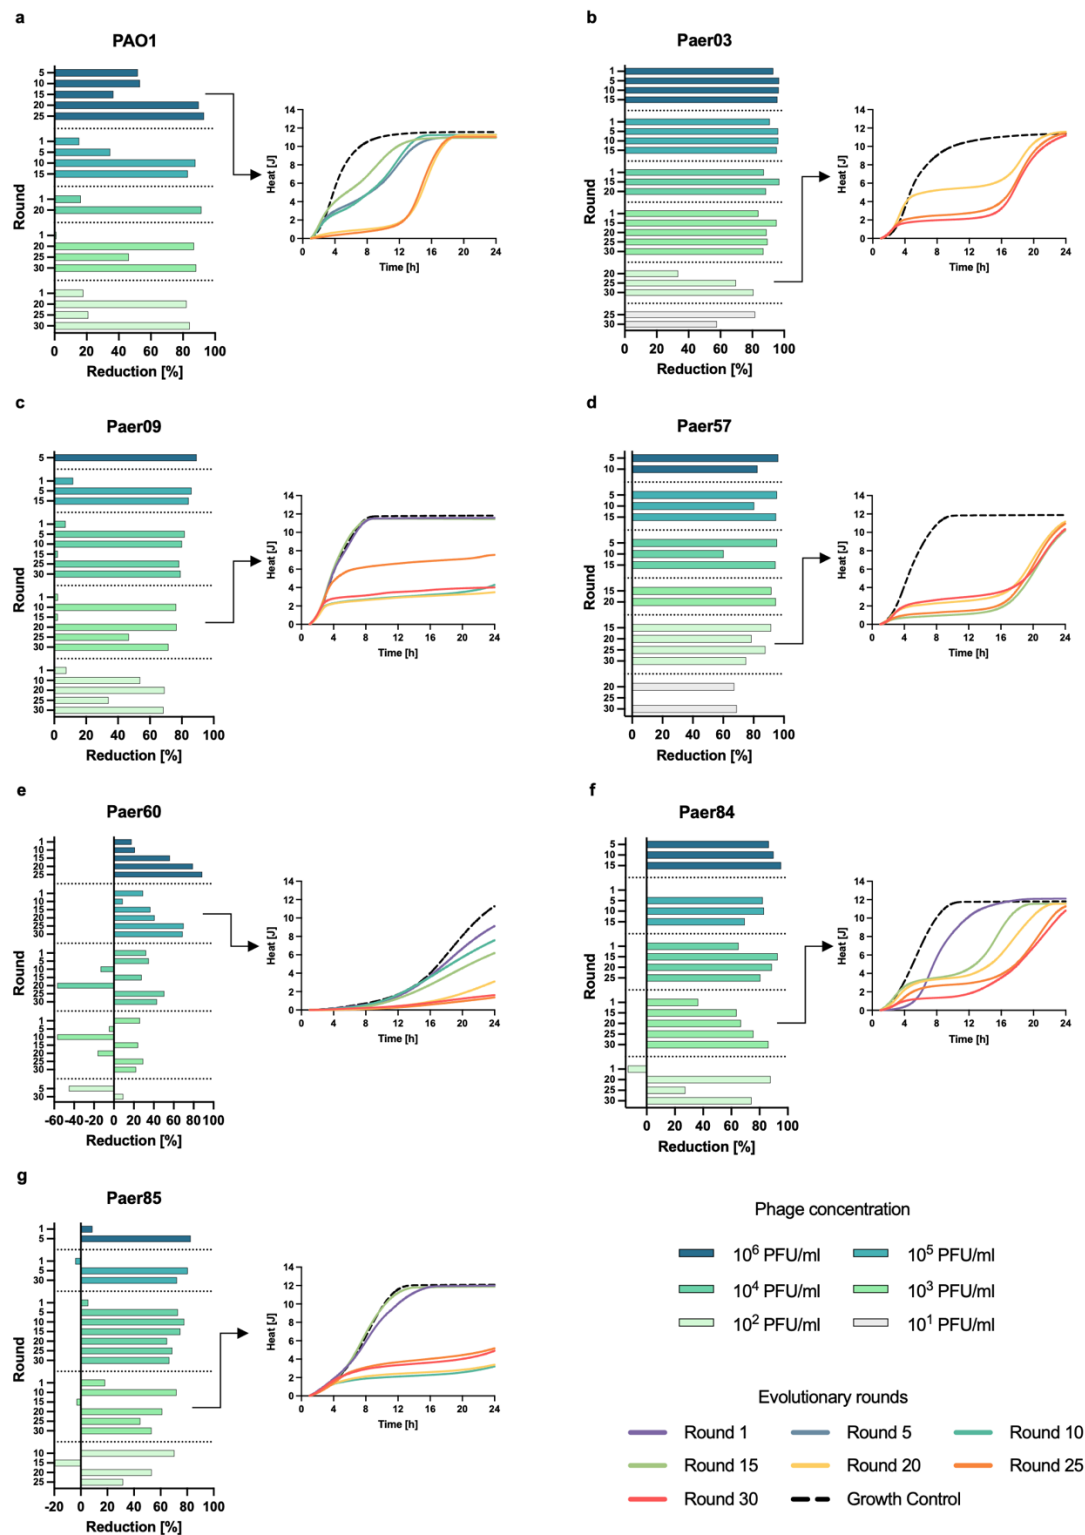

**Fig. E2: Bacteriophage activity analysis during the evolution assay.**

**a**, Heat reduction (%) plot of PAO1 exposed to the phage mixture at different concentrations (PFU/ml) compared to the growth control sample in different rounds of the evolution after 8 h of monitoring. Calorimetric heat (J) curves measured during a 24-h exposure of PAO1 to phages at the same

31 concentration within different evolutionary rounds. **b**, Identical setup for the tested strain Paer03. **c**,  
32 Identical setup for the tested strain Paer09. **d**, Identical setup for the tested strain Paer57. No phage plaques  
33 could be identified when spotting the initial phage solution (round 0) on Paer57. **e**, Identical setup for the  
34 tested strain Paer60. **f**, Identical setup for the tested strain Paer84. **g**, Identical setup for the tested strain  
35 Paer85.
